# Supplementary material for: Exploring Professionalism Among Final Year Dental Students and New Graduates: Translating Knowledge To Practice
Source: Research Square preprint supplement (doi:10.21203/rs.3.rs-718165/v1), 2021-07-21
Supplement: Supplementary file 1 [file 011cf122e126c9c63f53dca4.docx]

**Appendices**

Appendix 1. Perception of professional competency survey (<https://forms.gle/7fez3LktjSAeLESr6>)

Appendix 2. Evaluation of the perceived professional competencies survey (<https://forms.gle/opLCydDHJedacLTU6>)
